# Supplementary material for: Seismic monitoring of urban activity in Barcelona during the COVID-19 lockdown
Source: Copernicus journal article supplement (doi:10.5194/se-12-725-2021), 2021-03-26
Supplement: Supplementary file 1 [file se-12-725-2021-supplement.zip]

Archive with 6 entries (6 files):
- SupplFigS4.pdf
- Supplementary Material_Captions.pdf
- SupplFigS2.pdf
- SupplFigS1.pdf
- SupplFigS3.pdf
- se-12-725-2021-supplement-title-page.pdf
