# Supplementary material for: Seismic monitoring of urban activity in Barcelona during the COVID-19 lockdown
Source: Copernicus journal article supplement (doi:10.5194/se-12-725-2021), 2021-03-26
Supplement: Supplementary file 1 [file se-12-725-2021-supplement.zip › se-12-725-2021-supplement-title-page.pdf]

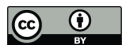

## *Supplement of*

# **Seismic monitoring of urban activity in Barcelona during the COVID-19 lockdown**

**Jordi Diaz et al.**

*Correspondence to:* Jordi Diaz ([jdiaz@geo3bcn.csic.es](mailto:jdiaz@geo3bcn.csic.es))

- [se-12-725-2021-supplement-title-page.pdf](#)
- [SupplFigS1.pdf](#)
- [SupplFigS2.pdf](#)
- [SupplFigS3.pdf](#)
- [SupplFigS4.pdf](#)
- [Supplementary Material\\_Captions.pdf](#)

The copyright of individual parts of the supplement might differ from the article licence.
